# Supplementary material
Source: PubMed Central journal article supplement (PMC5338667)
Supplement: supp_pp.16.01493_PP2016-01493R1_Supplemental_Material.pdf [file supp_pp.16.01493_PP2016-01493R1_Supplemental_Material.pdf]

## **Supplemental Materials**

**Supplemental Figure S1.** Protein alignment of GHF 9 enzymes from insects.

**Supplemental Figure S2.** Phylogenetic tree for amino acid sequences of NIEG1 and reported insect endogenous endo- $\beta$ -1,4-glucanases.

**Supplemental Figure S3.** The growth phenotype of BPH nymphs 6 days after they had been injected with either *GFP* (left) or *NIEG1* (right) dsRNA. Representative photographs are shown.

**Supplemental Table S1.** Primers and probes used for qRT-PCR and PCR.

|     |                                                                                                                      |     |
|-----|----------------------------------------------------------------------------------------------------------------------|-----|
| Ap  | .....M WYATNMNFVILAS.....FLLAGVARCVDYDEVLRISLIFYEACRSGLFVNNRIF                                                       | 53  |
| Bi  | MELNAFVITYVASLAIASIAEIDTINANFFYVVKPIEEDENDYARVLEISLIFYEACRSGLFENNRFIF                                                | 67  |
| Ae  | .....M M YRQILFAILITSTCEINAVPTEDAKAIENGNDYACVLEISLIFYEACRSGLFKNNRFIS                                                 | 61  |
| Ca  | .....M R V F V C L I S A L A I C Q ..... A A Y D Y T V I L K S S L I F Y E A C R S G L P A D C K V T                 | 46  |
| Tc  | .....M F Y S L W L L F I T E G ..... S A Y D Y R H A L K I S L I F Y E A C R S G L P A S N R F I T                   | 45  |
| Mb  | .....M W V F A Y L L S A L A I C Q ..... A A Y D Y K T V L S N S L I F Y E A C R S G L P A D C K V T                 | 46  |
| Of  | .....M R V F V C L I S A L A I C Q ..... G A Y D Y K T V I R N S L I F Y E A C R S G L P A D C K V T                 | 46  |
| NL  | .....M N F S H L G L Y V L L A T S T ..... F T Y C V F G S K Y D Y S K V V H I S L I F Y E A C R S G L P A N N R I F | 54  |
| ◆ ◆ |                                                                                                                      |     |
| Ap  | WRPDSATTDFKQNGEDISGGYYLACDFVKFCFTMASTTTTLAWGYLSYKDAYEEVNEWENALGSIWF                                                  | 120 |
| Bi  | WRPDSALDRGLNGEDLTGGYYLACDFVKFCFTMASTTTTLAWGAVSWPEAYNAAGQLIEELRKAIKW                                                  | 134 |
| Ae  | WRGDSALYDRGNSGEDIIGYYLACDFVKFCFTMASTTTTLAWGTVNWPEAYIAAGQLIEIRRAIKW                                                   | 128 |
| Ca  | WRKDSALDRGNNGEDLTGGYYLACDFVKFCFTMASTTTTLAWGLVLYEAGYSSAGATLDGRKAVKW                                                   | 113 |
| Tc  | WRPDSALDRGLNGEDLTGGYYLACDFVKFCFTMASTTTTLAWGMLFRHAYNEAGCYCHGLDAIKW                                                    | 112 |
| Mb  | WRKDSALNRKQNGEDIIGYYLACDFVKFCFTMASTTTTLAWGLVLYEAGYSSAGALIDGRKALKW                                                    | 113 |
| Of  | WRKDSALNRKQNGEDIIGYYLACDFVKFCFTMASTTTTLAWGLVLYAAGYTSAGALIDGRKAVKW                                                    | 113 |
| NL  | WRGDSALNRGLKEDIIGYYLACDFVKFCFTMASTTTTLAWGCLSYKDAYKAAGEWKEVLNAIKW                                                     | 121 |
| Ap  | AAEYLIKCHVSDYEFYQVGGFFSDGGEWGRPEDMNMSRFSKIDKNRPGS DLAGE TSAALSASVMV                                                  | 187 |
| Bi  | ATDYLIKCHVSEYVYQVGGFFSDTEWGRPEELNTRPAYKIDPEHPGS DLAGE TAALAAASSMV                                                    | 201 |
| Ae  | STTYLIKCHVSENVLYQVGGFFSDHMEWGRPEELNTRPAYKIDAEHPGS DLAGE TAALAAASSIV                                                  | 195 |
| Ca  | ATDYLIKCHVSEYVYQVGGFFSDHAYWGRPEDMTARPAYKIDAEHPGS DLAGE TAALAAASSIV                                                   | 180 |
| Tc  | ATDYLIKCHVSEYVYQVGGFFSDHAFWGRPEENMTRPAYKIDIEHPGS DLAGE TAALAAASSIL                                                   | 179 |
| Mb  | ATDYLIKCHVSEYVYQVGGFFSDHSYWGRPEDMTISRPAEKIDTSKPGS DLAGE TAALAAASSIV                                                  | 180 |
| Of  | ATDYLIKCHVSEYVYQVGGFFSDHSYWGRPEDMTISRPAEKIDAEHPGS DLAGE TAALAAASSIV                                                  | 180 |
| NL  | ATDYLIKCHVSEYVYQVGGFFSDHMEWGRPEDMNMSRFAKIDAEHPGS DLAGE TAALAAASSMV                                                   | 188 |
| Ap  | FTKILSNFSASCLSHARQLYMFATCYRGLYHEATKGAACQYBSTTYGDELTWAAAWLWKATKESQYL                                                  | 254 |
| Bi  | ERNHIFPEYSAKCLRHAKELKFAEYRGLYHEATKGAACQYBSTDYCEDELAWAAVWLKATNLTITYL                                                  | 268 |
| Ae  | FSSVISEMSAKCLRHAKELKFAEYRGLYHEATKGAACQYBSTDYCEDELAWAAVWLKATGRTKYF                                                    | 262 |
| Ca  | EKGVLESSYNNLLRHARQLYMFATCYRGLYHEATKGAACQYBSTDYCEDELAWAAVWLKATNENTYL                                                  | 247 |
| Tc  | FENENCSYSDELLRHATELYDFATNYRGLYHEATKGAACQYBSTDYCEDELAWAAVWLKATKIVKYI                                                  | 246 |
| Mb  | EKNVLESSYNNLLRHARQLYMFATCYRGLYHEATKGAACQYBSTDYCEDELAWAAVWLKATNENTYL                                                  | 247 |
| Of  | EKAVLPSYNNLLRHARQLYMFATCYRGLYHEATKGAACQYBSTDYCEDELAWAAVWLKATNLTITYL                                                  | 247 |
| NL  | EKEETPEMSDCLLRHARQLYMFATCYRGLYHEATKGAACQYBSTDYCEDELAWAAVWLKATGENNYI                                                  | 255 |
| Ap  | DDAEYMYMKVFLKERENEFYFNKRVAGVQVLLAELTNCSETEAIQNFCDYNIYVQKTPKGLIYIE                                                    | 321 |
| Bi  | EDAEHHYCHEHLKERENEFYFNKRVAGVQVLLAELTNCSETEAIQNFCDYNIYVQKTPKGLIYID                                                    | 335 |
| Ae  | DDAEHHYCHEHLKERENAFYFNKRVAGVQVLLAELTNCSETEAIQNFCDYNIYVQKTPKGLIYIE                                                    | 329 |
| Ca  | TKAEISLYNERGLGNWGAENWENKVSQVQVLLAKITSKQAKETVQCYVDYLINNCQKTPKGLIYID                                                   | 314 |
| Tc  | EQAEITFYTKFIFKRENEFFYFNKRVAGVQVLLAELTNCSETEAIQNFCDYNIYVQKTPKGLIYIE                                                   | 311 |
| Mb  | NTAEISLYNERGLGNWGAENWENKVSQVQVLLAKITNKCCYKDTIKCYVDYLINTCKKTPKGLIYID                                                  | 314 |
| Of  | NTAEISLHNCFCIQWNGGFSWDAKVSQVQVLLAKITNKCCYKDAIKCYVDYLINACQKTPKGLIYIE                                                  | 314 |
| NL  | DEAEYFYMRFLKRENEFFYFNKRVAGVQVLEAQLTKRDDYVCAARAFCDYNIYVQKTPKGLIYIE                                                    | 322 |
| Ap  | KSGILCHAAANVFLICLCAAL.IGIM.SAQCFAFAFYCILDYLGDDGGSYVVGFGKNEYIKCFEASS                                                  | 386 |
| Bi  | KEGILCHAAANVAVFLICLCAAL.IGIM.SAQCFAFAFYCILDYLGDDGGSYVVGFGKNEYIKCFEASS                                                | 402 |
| Ae  | KSGILSHVAVNVAFLICLCAAL.IGIM.SAQCFAFAFYCILDYLGDDGGSYVVGFGKNEYIKCFEASS                                                 | 396 |
| Ca  | QWGLIRHAAANVFLICLCAAL.IGIM.SAQCFAFAFYCILDYLGDDGGSYVVGFGKNEYIKCFEASS                                                  | 379 |
| Tc  | KSGILSHVAVNVAFLICLCAAL.IGIM.SAQCFAFAFYCILDYLGDDGGSYVVGFGKNEYIKCFEASS                                                 | 377 |
| Mb  | VGGSLRHASNAAFVILCAAL.IGIM.SAQCFAFAFYCILDYLGDDGGSYVVGFGKNEYIKCFEASS                                                   | 379 |
| Of  | VWGSIRHASNAAFVILCAAL.IGIM.SAQCFAFAFYCILDYLGDDGGSYVVGFGKNEYIKCFEASS                                                   | 379 |
| NL  | KIGILCHAAANVAVFLICLCAAL.IGIM.SAQCFAFAFYCILDYLGDDGGSYVVGFGKNEYIKCFEASS                                                | 387 |
| Ap  | CLDFEAFQDWEAYRSEKPNFCVILGALVSGPDENDNYKDLFEYIYNEVTLIDYNAGFCSAVAGIHL                                                   | 453 |
| Bi  | CPDFEAVCGWFEFDKDAE.CIILMGALVSGPDEADKFDHREDYVYTEVTLIDYNAGFTSALAGIHL                                                   | 467 |
| Ae  | CPNKEFTECWCFCFSKNAPNFCIILMGALVSGPDEVDLEKDCFEYAYTEVTLIDYNAGFTSALAGIHL                                                 | 463 |
| Ca  | CPDAEAVCDWTFNSELDNFHVITGALVSGPDCNDNYVDDFSDYVSEVATIDYNAGFCSAVAIVTL                                                    | 446 |
| Tc  | CPNIEEFCQWQCFETWKGPNFCIILMGALVSGPDCNDHYEDVFEFELYNEVTLIDYNAGFCSTLAGIYI                                                | 444 |
| Mb  | CPFAEAVCDWSTYSSELDNFYVITGALVSGPDENDNYVDDFNDYVHNEVACIDYNAGFCSAVAIVTL                                                  | 446 |
| Of  | CPDAEAVCDWSTYSSELDNFHVITGALVSGPDCNDNYVDDFNDYVQNVVACIDYNAGFCSAVSAIVTL                                                 | 446 |
| NL  | CPNIEFVKCGWEAYNSTKDNFCVILGALVSGPDENDNYKDLFEYIYNEVTLIDYNAGFCSAVAGIHL                                                  | 454 |
| Ap  | ELRASRHKAMMDANGLQLSSNATD                                                                                             | 477 |
| Bi  | RVKSTI.....                                                                                                          | 473 |
| Ae  | QLKNVDTRPLKEN.....                                                                                                   | 476 |
| Ca  | GV.....                                                                                                              | 448 |
| Tc  | ENENKL.....                                                                                                          | 450 |
| Mb  | GY.....                                                                                                              | 448 |
| Of  | GY.....                                                                                                              | 448 |
| NL  | ELNNNS.....                                                                                                          | 461 |

**Supplemental Figure S1.** Protein alignment of GHF 9 enzymes from insects. Selected proteins accession numbers: Ae (*Acromyrmexechinator*, EGI63652), Ap (*Acyrtosiphonpisum*, XP\_001944774), Bi (*Bombus impatiens*, XP\_003494151), Ca (*Coptotermesacinaciformis*, AAK12339), Mb (*Macrotermesbarneyi*, AFD33365), Tc

(*Triboliumcastaneum*, EFA05721), Of (*Odontotermesformosanus*, ADB82658), NI (*Nilaparvatalugens*, NIEG1). The colors of the aligned sequences showed the degree of amino acid similarity, including identical (black), highly conserved (dark gray) and conserved residues (gray). The catalytic nucleophile, probable secondary nucleophile, and proton acceptor (Glu) of the conserved catalytic domain for GHF 9 are represented as solid diamond, open diamond, and solid circle, respectively. Two GHF 9 signature motifs are in bold below the alignment.

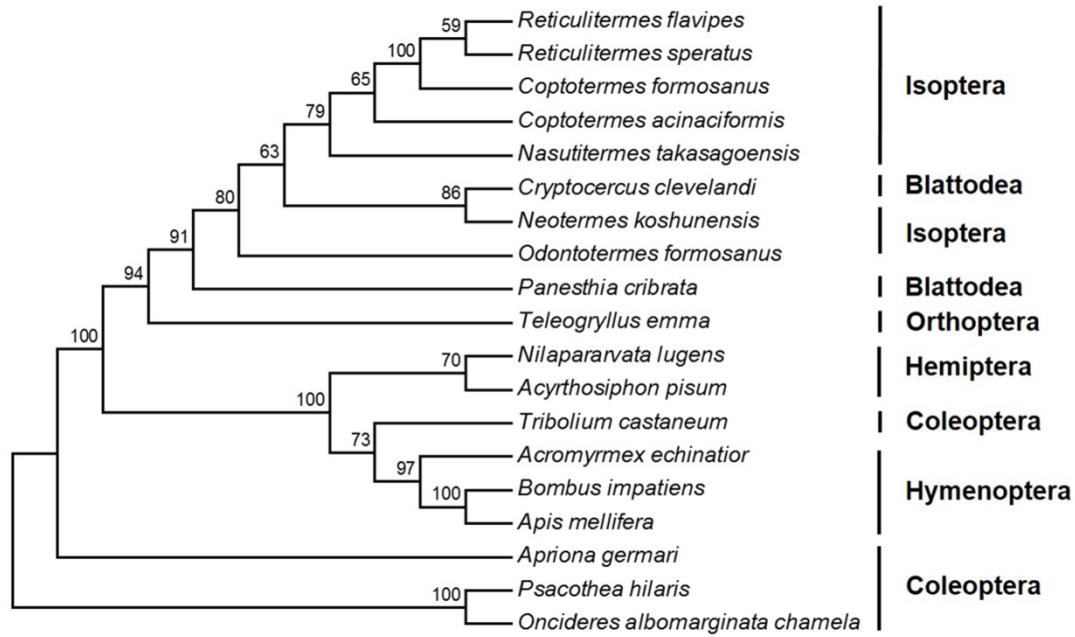

**Supplemental Figure S2.** Phylogenetic tree for amino acid sequences of NIEG1 and reported insect endogenous endo-β-1,4-glucanases. Selected proteins accession numbers: *Acromyrmexechinator* (XP\_396791), *Acyrtosiphonpisum* (XP\_001944774), *Apismellifera* (XP\_396791), *Aprionagermari* (AAN78326), *Bombus impatiens* (XP\_003494151), *Coptotermesacinaciformis* (AAK12339), *Coptotermesformosanus* (ACI75756), *Cryptocercusclevelandi* (AAF63720), *Nasutitermestakasagoensis* (BAA33708), *Neotermeskoshunensis* (BAD12005), *Odontotermesformosanus* (ADB82658), *Oncideresalbomarginatachamela* (ADI24131), *Panesthiacribrata* (AAF80584), *Psacotheahilaris* (BAB86867), *Reticulitemessperatus* (BAA31326), *Reticulitermesflavipes*(AAU20853), *Teleogryllusemma* (ABV32557), *Triboliumcastaneum* (EFA05721).

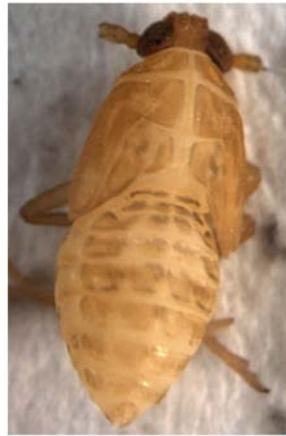

*dsGFP*

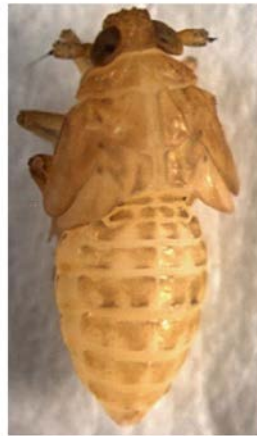

*dsNIEG1*

**Supplemental Figure S3.** The growth phenotype of BPH nymphs 6 days after they had been injected with either *GFP* (left) or *NIEG1* (right) dsRNA. Representative photographs are shown.

**Supplemental Table S1. Primers and probes used for qRT-PCR and PCR.**

| <b>Gene</b>  | <b>Description</b> | <b>Forward primer (5'-...-3')</b> | <b>Reverse primer (5'-...-3')</b> | <b>Probe (5'-...-3')</b>  |
|--------------|--------------------|-----------------------------------|-----------------------------------|---------------------------|
| <i>NIEG1</i> | qPCR               | ATGATAGAGGGCTGAAGGGTG             | TAGTAATGTCGTGGTGCTGGC             | TGTCACCAGCGTCGTAGTAGCCTCC |
| <i>Actin</i> | qPCR               | ATGAAACCGTCTACAACCTCG             | GCATCCTGTCGGCAATAC                | CGTCGACATCCGTAAGGACCT     |
| <i>NIEG1</i> | Cloning            | TGTAGGAATTGAGCAGCAAG              | ATAAATTCTTTGGTGCATCC              |                           |
| <i>NIEG1</i> | Protein expression | GGGGTACCAGCAAATACGACTACAGC        | GCTCTAGAAATGAGTTGTCATTATTCA       |                           |
| <i>NIEG1</i> | dsRNAsynthesis     | GGATCCTAATACGACTCACTATAGGGCA      | GGATCCTAATACGACTCACTATAGGACT      |                           |
|              |                    | CGCTAAGCAACTCTT                   | CGTTCGGTCTGTCCT                   |                           |
| <i>GFP</i>   | dsRNA synthesis    | GGATCCTAATACGACTCACTATAGGAA       | GGATCCTAATACGACTCACTATAGGCAG      |                           |
|              |                    | GGGCGAGGAGCTGTTCACCG              | CAGGACCATGTGATCGCGC               |                           |
